# Supplementary material
Source: bioRxiv or medRxiv preprint supplement (https://www.biorxiv.org/highwire/filestream/96063/field_highwire_adjunct_files/0/313072-1.pdf)
Supplement: Supplementary file [file 313072-1.pdf]

**Suppl. Table 1.** Effects of omeprazole (80µg/mL) on the effects of antiviral nucleoside analogues on virus-induced cytopathogenic effect (CPE) formation. The investigated drug concentrations did not affect cell viability, neither alone, nor in combination.

**A)** Effects of omeprazole (80µg/mL) on the effects of ribavirin on CPE formation in West Nile virus-infected Vero cells and H1N1-infected MDCK cells.

|                 | + Omeprazole (80µg/mL)        |                            |                               |                          |
|-----------------|-------------------------------|----------------------------|-------------------------------|--------------------------|
|                 | Ribavirin (µg/mL)             |                            | Ribavirin (µg/mL)             |                          |
|                 | IC <sub>50</sub> <sup>1</sup> | CPE formation <sup>2</sup> | IC <sub>50</sub> <sup>1</sup> | Fold change <sup>3</sup> |
| West Nile virus | 18.1 ± 3.5                    | 96 ± 18                    | 21.6 ± 7.3                    | 0.84                     |
| H1N1            | 4.2 ± 1.5                     | 98 ± 13                    | 3.8 ± 1.1                     | 1.11                     |

**B)** Effects of omeprazole (80µg/mL) on the effects of acyclovir on CPE formation in herpes simplex type 1 (HSV-1)- or HSV-2-infected Vero cells.

|       | + Omeprazole (80µg/mL)        |                            |                               |                          |
|-------|-------------------------------|----------------------------|-------------------------------|--------------------------|
|       | Acyclovir (µg/mL)             |                            | Acyclovir (µg/mL)             |                          |
|       | IC <sub>50</sub> <sup>1</sup> | CPE formation <sup>2</sup> | IC <sub>50</sub> <sup>1</sup> | Fold change <sup>3</sup> |
| HSV-1 | 0.62 ± 0.06                   | 99 ± 17                    | 0.05 ± 0.01                   | 10.8                     |
| HSV-2 | 1.42 ± 0.17                   | 99 ± 17                    | 0.44 ± 0.12                   | 7.3                      |

**C)** Effects of omeprazole (80µg/mL) on the effects of acyclovir on CPE formation in HSV-1- or HSV-2-infected HaCat cells.

|       | + Omeprazole (80µg/mL)        |                            |                               |                          |
|-------|-------------------------------|----------------------------|-------------------------------|--------------------------|
|       | Acyclovir (µg/mL)             |                            | Acyclovir (µg/mL)             |                          |
|       | IC <sub>50</sub> <sup>1</sup> | CPE formation <sup>2</sup> | IC <sub>50</sub> <sup>1</sup> | Fold change <sup>3</sup> |
| HSV-1 | 0.54 ± 0.05                   | 105 ± 21                   | 0.013 ± 0.006                 | 47.7                     |
| HSV-2 | 3.20 ± 0.75                   | 105 ± 21                   | 0.11 ± 0.03                   | 12.9                     |

<sup>1</sup> Concentration that reduces CPE formation by 50% presented as mean ± S.D.

<sup>2</sup> CPE formation in the presence of omeprazole (80µg/mL) alone

<sup>3</sup> Fold change: IC<sub>50</sub> ribavirin/ IC<sub>50</sub> in the presence of omeprazole (80µg/mL)
